# Supplementary material for: Distinctive electron transport on pyridine-linked molecular junctions with narrow monolayer graphene nanoribbon electrodes compared with metal electrodes and graphene electrodes
Source: Royal Society of Chemistry journal article supplement (doi:10.1039/c6cp05007g), 2016-01-01
Supplement: c6cp05007g1.pdf [file c6cp05007g1.pdf]

**Supporting Information for: Distinctive Electron Transport  
on Pyridine-Linked Molecular Junction with Narrow  
Monolayer Graphene Nanoribbons Electrodes Compared  
with Metal Electrodes and Graphene Electrodes**

Jie Li, Tao Li, Yi Zhou, Weikang Wu, Leining Zhang, Hui Li\*

*Key Laboratory for Liquid-Solid Structural Evolution and Processing of  
Materials, Ministry of Education, Shandong University, Jinan 250061,  
People's Republic of China.*

Email: [lihuilmy@hotmail.com](mailto:lihuilmy@hotmail.com)

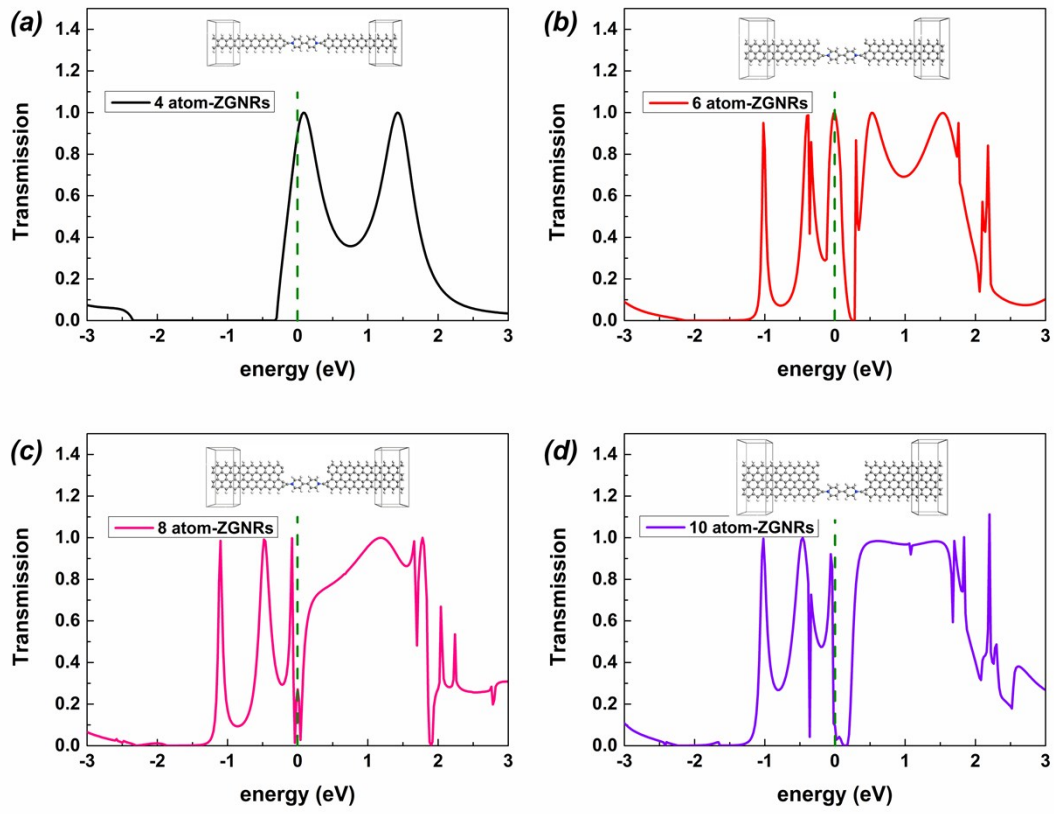

**Figure S1** (a)-(d) Transmission spectra of the devices with 4-atoms wide ZGNRs, 6-atoms wide ZGNRs, 8-atoms wide ZGNRs and 10-atoms wide ZGNRs electrodes respectively; the insets are structures of these devices.

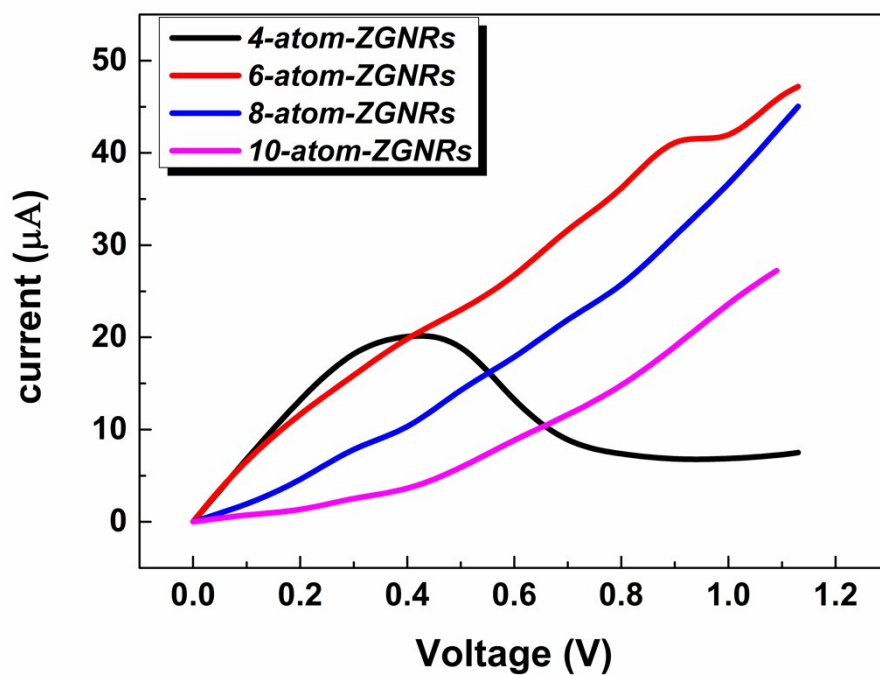

**Figure S2** I-V curves of the devices with 4-atoms wide ZGNRs, 6-atoms wide ZGNRs, 8-atoms wide ZGNRs and 10-atoms wide ZGNRs electrodes in a bias region [0V, 1.2V].

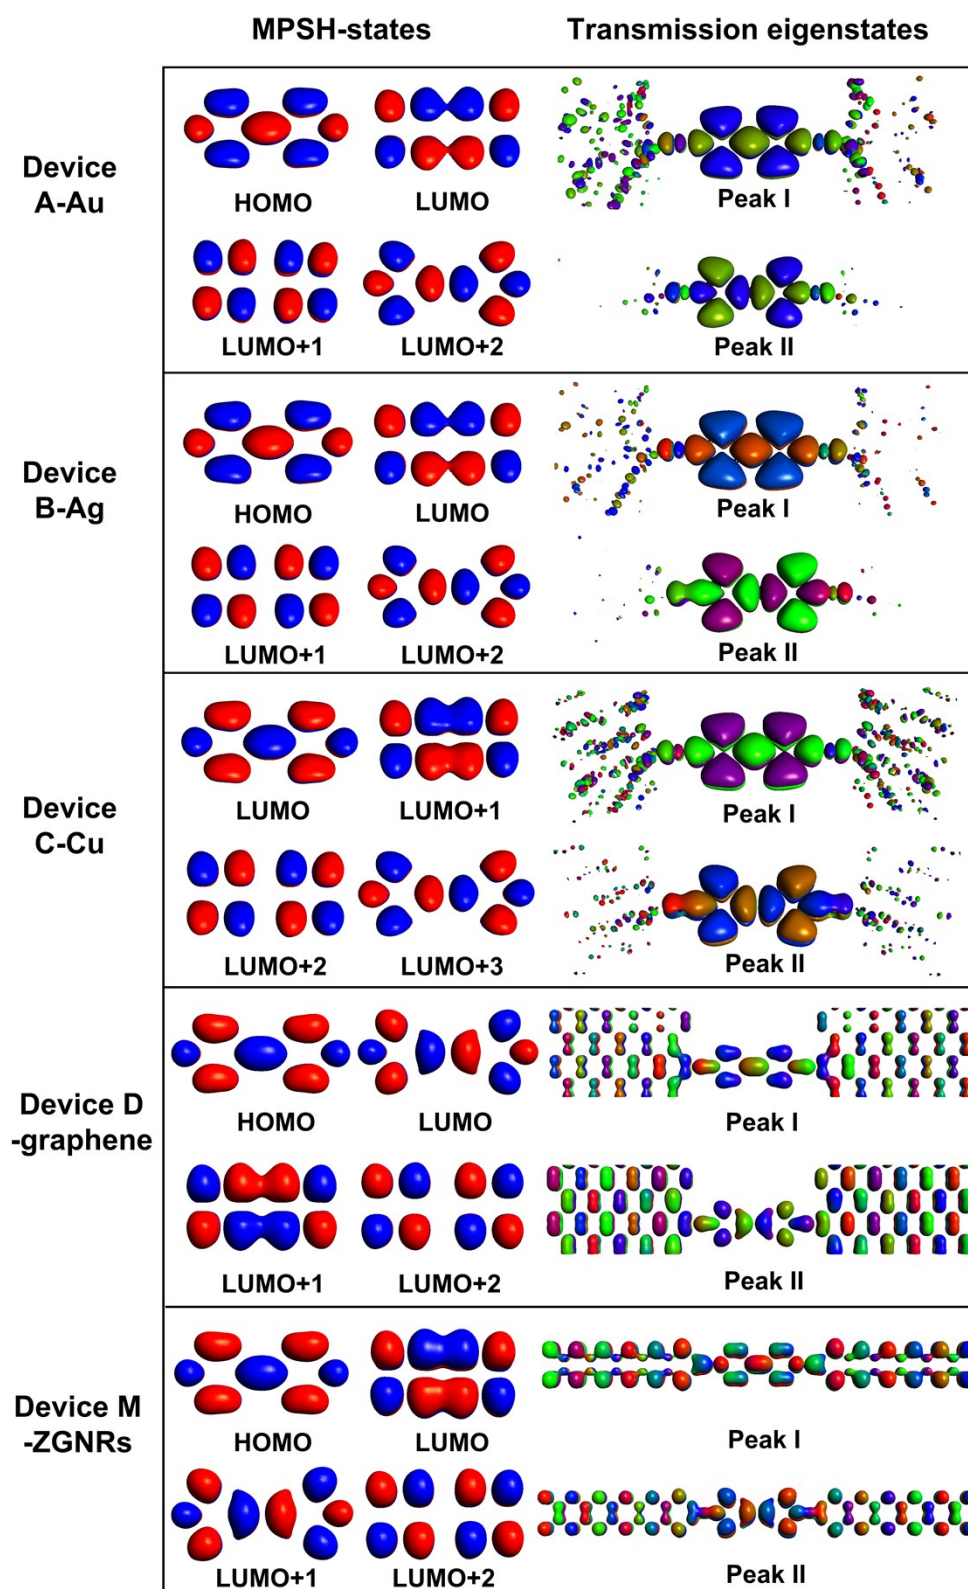

**Figure S3** The molecular projected self-consistent Hamiltonian (MPSH) eigenstates and the transmission eigenstates of these studied devices at zero bias.
